# Supplementary material
Source: PubMed Central journal article supplement (PMC3428756)
Supplement: peds.2011-3353_peds.2011-3353SupplementaryData.pdf [file peds.2011-3353_peds.2011-3353SupplementaryData.pdf]

## Supplemental Information

**SUPPLEMENTAL TABLE 4** Adjusted Differences Between Competitive Food Law Categories<sup>a</sup> in Within-Student Changes in Purchasing of Sweets, Snacks, and SSBs<sup>b</sup>

| Year(s)                | Category         | Sweets  |              | Salty snacks |             | SSBs    |             |
|------------------------|------------------|---------|--------------|--------------|-------------|---------|-------------|
|                        |                  | $\beta$ | 95% CI       | $\beta$      | 95% CI      | $\beta$ | 95% CI      |
| 2003 <sup>c</sup>      | None             | —       | —            | —            | —           | —       | —           |
|                        | Weak             | 0.09    | -0.23, 0.42  | 0.00         | -0.22, 0.21 | 0.03    | -0.18, 0.25 |
|                        | Strong           | -0.13   | -0.50, 0.25  | -0.11        | -0.33, 0.11 | -0.02   | -0.50, 0.45 |
| 2003–2006 <sup>d</sup> | No change–none   | —       | —            | —            | —           | —       | —           |
|                        | No change–weak   | -0.50   | -1.01, 0.00  | -0.33        | -0.82, 0.17 | -0.13   | -0.70, 0.43 |
|                        | No change–strong | -0.31   | -0.72, -0.11 | 0.07         | -0.16, 0.30 | -0.18   | -0.39, 0.03 |
|                        | New laws–weak    | -0.23   | -0.72, 0.26  | 0.02         | -0.29, 0.33 | -0.18   | -0.76, 0.40 |
|                        | New laws–strong  | 0.00    | -0.33, 0.33  | 0.09         | -0.22, 0.40 | -0.12   | -0.47, 0.22 |
|                        | Weaker laws      | -0.04   | -0.47, 0.38  | 0.04         | -0.49, 0.57 | -0.33   | -1.19, 0.53 |

<sup>a</sup> Law categories were based on laws regarding food only (for analyses of sweets and salty snacks) or beverages only (for analyses of SSBs).

<sup>b</sup> Number of purchases within school in the past week.

<sup>c</sup> State middle school law in 2003;  $\beta$  coefficients estimated from general linear model, adjusted for race/ethnicity, gender, age, locale, SES, Census region, physical activity level, and 2003 state obesity prevalence.

<sup>d</sup> Difference between mean rating for state elementary school laws in 2003 and middle school laws in 2006;  $\beta$  coefficients estimated from fixed-effect model, adjusted for SES and locale. No change–none: Equal mean rating (0). No change–weak: Equal mean rating (1–2). No change–strong: Equal mean rating (>2). New laws–weak: Mean higher for 2006 middle school laws (1–2). New laws–strong: Mean higher for 2006 middle school laws (>2). Weaker laws: Mean lower for 2006 middle school laws.
